# Supplementary material for: The Complete Nucleotide Sequence and Gene Organization of the Mitochondrial Genome of Triatoma boliviana (Hemiptera, Reduviidae, Triatominae) and Phylogenetic Comparisons
Source: MDPI journal article supplement (doi:10.3390/entomology1010002), 2022-04-18
Supplement: s1 [file s1]

## **SUPPLEMENTARY MATERIAL**

The complete nucleotide sequence and gene organization of the mitochondrial genome of *Triatoma boliviiana* (Hemiptera, Reduviidae, Triatominae) and phylogenetic comparisons

Sebastián Pita, Pablo Mora, Mirko Rojas-Cortez, Teresa Palomeque, Pedro Lorite, Francisco Panzera

**Table S1.** Annotation of the complete mitogenome of *Triatoma boliviana*. Negative numbers in the “intergenic spacers” column indicate genes overlaps.

| Gene                         | Strand | Nucleotide Number | Intergenic Spacers | Start Codon | Stop Codon |
|------------------------------|--------|-------------------|--------------------|-------------|------------|
| (I) <i>tRNA-Ile</i>          | H      | 1–63              | –3                 | –           | –          |
| (Q) <i>tRNA-Gln</i>          | L      | 61–129            | –1                 | –           | –          |
| (M) <i>tRNA-Met</i>          | H      | 129–196           |                    | –           | –          |
| <i>nd2</i>                   | H      | 197–1195          | 5                  | ATT         | TAA        |
| (W) <i>tRNA-Trp</i>          | H      | 1201–1267         | –8                 | –           | –          |
| (C) <i>tRNA-Cys</i>          | L      | 1260–1322         |                    | –           | –          |
| (Y) <i>tRNA-Tyr</i>          | L      | 1323–1387         |                    | –           | –          |
| <i>coI</i>                   | H      | 1388–2921         |                    | ATG         | T(aa)      |
| (L) <i>tRNA-Leu</i> (1, UUR) | H      | 2922–2988         |                    | –           | –          |
| <i>coII</i>                  | H      | 2989–3667         |                    | ATA         | T(aa)      |
| (K) <i>tRNA-Lys</i>          | H      | 3668–3737         | –1                 | –           | –          |
| (D) <i>tRNA-Asp</i>          | H      | 3737–3801         |                    | –           | –          |
| <i>ATPase8</i>               | H      | 3802–3957         | –7                 | ATC         | TAA        |
| <i>ATPase6</i>               | H      | 3951–4634         | –14                | ATG         | TAA        |
| <i>coIII</i>                 | H      | 4621–5404         |                    | ATG         | T(aa)      |
| (G) <i>tRNA-Gly</i>          | H      | 5405–5467         | –3                 | –           | –          |
| <i>nd3</i>                   | H      | 5465–5820         |                    | ATA         | TA(a)      |
| (A) <i>tRNA-Ala</i>          | H      | 5821–5884         | 5                  | –           | –          |
| (R) <i>tRNA-Arg</i>          | H      | 5890–5954         | 8                  | –           | –          |
| (N) <i>tRNA-Asn</i>          | H      | 5963–6029         | –1                 | –           | –          |
| (S) <i>tRNA-Ser</i> (1, AGN) | H      | 6029–6097         |                    | –           | –          |
| (E) <i>tRNA-Glu</i>          | H      | 6098–6160         | 4                  | –           | –          |
| (F) <i>tRNA-Phe</i>          | L      | 6165–6229         |                    | –           | –          |
| <i>nd5</i>                   | L      | 6230–7941         |                    | ATT         | TA(a)      |
| (H) <i>tRNA-His</i>          | L      | 7942–8009         |                    | –           | –          |
| <i>nd4</i>                   | L      | 8010–9340         | –7                 | ATG         | TA(a)      |
| <i>nd4L</i>                  | L      | 9334–9627         | 2                  | ATG         | TAG        |
| (T) <i>tRNA-Thr</i>          | H      | 9630–9691         |                    | –           | –          |
| (P) <i>tRNA-Pro</i>          | L      | 9692–9755         | 3                  | –           | –          |
| <i>nd6</i>                   | H      | 9759–10259        | –1                 | ATG         | TAA        |
| <i>cytB</i>                  | H      | 10259–11395       |                    | ATG         | TAA        |
| (S) <i>tRNA-Ser</i> (2, UCN) | H      | 11396–11463       | 767                | –           | –          |
| <i>nd1</i>                   | L      | 12231–13160       | –6                 | ATA         | TAA        |
| (L) <i>tRNA-Leu</i> (2, CUN) | L      | 13155–13219       |                    | –           | –          |
| <i>lrRNA</i>                 | L      | 13220–14480       |                    | –           | –          |
| (V) <i>tRNA-Val</i>          | L      | 14481–14552       |                    | –           | –          |
| <i>srRNA</i>                 | L      | 14553–15335       |                    | –           | –          |
| Control region               |        | 15336–16719       |                    | –           | –          |

**Table S2.** Codon usage of *Triatoma boliviana* mitogenome protein coding genes.

| <b>Codon</b> | <b>n</b> | <b>%</b> | <b>RSCU</b> | <b>Codon</b> | <b>n</b> | <b>%</b> | <b>RSCU</b> |
|--------------|----------|----------|-------------|--------------|----------|----------|-------------|
| UUU(F)       | 282      | 7.62     | 1.67        | UAU(Y)       | 148      | 4.00     | 1.7         |
| UUC(F)       | 56       | 1.51     | 0.33        | UAC(Y)       | 26       | 0.70     | 0.3         |
| UUA(L)       | 348      | 9.40     | 3.95        | UAA(*)       | 12       | 0.32     | 1.85        |
| UUG(L)       | 47       | 1.27     | 0.53        | UAG(*)       | 1        | 0.03     | 0.15        |
| CUU(L)       | 68       | 1.84     | 0.77        | CAU(H)       | 52       | 1.40     | 1.41        |
| CUC(L)       | 8        | 0.22     | 0.09        | CAC(H)       | 22       | 0.59     | 0.59        |
| CUA(L)       | 52       | 1.40     | 0.59        | CAA(Q)       | 50       | 1.35     | 1.67        |
| CUG(L)       | 5        | 0.14     | 0.06        | CAG(Q)       | 10       | 0.27     | 0.33        |
| AUU(I)       | 348      | 9.40     | 1.77        | AAU(N)       | 129      | 3.48     | 1.61        |
| AUC(I)       | 46       | 1.24     | 0.23        | AAC(N)       | 31       | 0.84     | 0.39        |
| AUA(M)       | 240      | 6.48     | 1.8         | AAA(K)       | 79       | 2.13     | 1.56        |
| AUG(M)       | 27       | 0.73     | 0.2         | AAG(K)       | 22       | 0.59     | 0.44        |
| GUU(V)       | 106      | 2.86     | 2.27        | GAU(D)       | 65       | 1.76     | 1.86        |
| GUC(V)       | 6        | 0.16     | 0.13        | GAC(D)       | 5        | 0.14     | 0.14        |
| GUA(V)       | 65       | 1.76     | 1.39        | GAA(E)       | 70       | 1.89     | 1.54        |
| GUG(V)       | 10       | 0.27     | 0.21        | GAG(E)       | 21       | 0.57     | 0.46        |
| UCU(S)       | 120      | 3.24     | 2.62        | UGU(C)       | 47       | 1.27     | 1.74        |
| UCC(S)       | 22       | 0.59     | 0.48        | UGC(C)       | 7        | 0.19     | 0.26        |
| UCA(S)       | 87       | 2.35     | 1.9         | UGA(W)       | 84       | 2.27     | 1.7         |
| UCG(S)       | 3        | 0.08     | 0.07        | UGG(W)       | 15       | 0.41     | 0.3         |
| CCU(P)       | 66       | 1.78     | 2.03        | CGU(R)       | 22       | 0.59     | 1.63        |
| CCC(P)       | 18       | 0.49     | 0.55        | CGC(R)       | 1        | 0.03     | 0.07        |
| CCA(P)       | 46       | 1.24     | 1.42        | CGA(R)       | 26       | 0.70     | 1.93        |
| CCG(P)       | 0        | 0.00     | 0           | CGG(R)       | 5        | 0.14     | 0.37        |
| ACU(T)       | 89       | 2.40     | 1.85        | AGU(S)       | 32       | 0.86     | 0.7         |
| ACC(T)       | 28       | 0.76     | 0.58        | AGC(S)       | 6        | 0.16     | 0.13        |
| ACA(T)       | 73       | 1.97     | 1.52        | AGA(S)       | 93       | 2.51     | 2.03        |
| ACG(T)       | 2        | 0.05     | 0.04        | AGG(S)       | 4        | 0.11     | 0.09        |
| GCU(A)       | 63       | 1.70     | 1.91        | GGU(G)       | 77       | 2.08     | 1.42        |
| GCC(A)       | 21       | 0.57     | 0.64        | GGC(G)       | 9        | 0.24     | 0.17        |
| GCA(A)       | 42       | 1.13     | 1.27        | GGA(G)       | 104      | 2.81     | 1.92        |
| GCG(A)       | 6        | 0.16     | 0.18        | GGG(G)       | 27       | 0.73     | 0.5         |

A total of 3702 codons were analyzed.

RSCU: relative synonymous codon usage.

\* =termination codon.

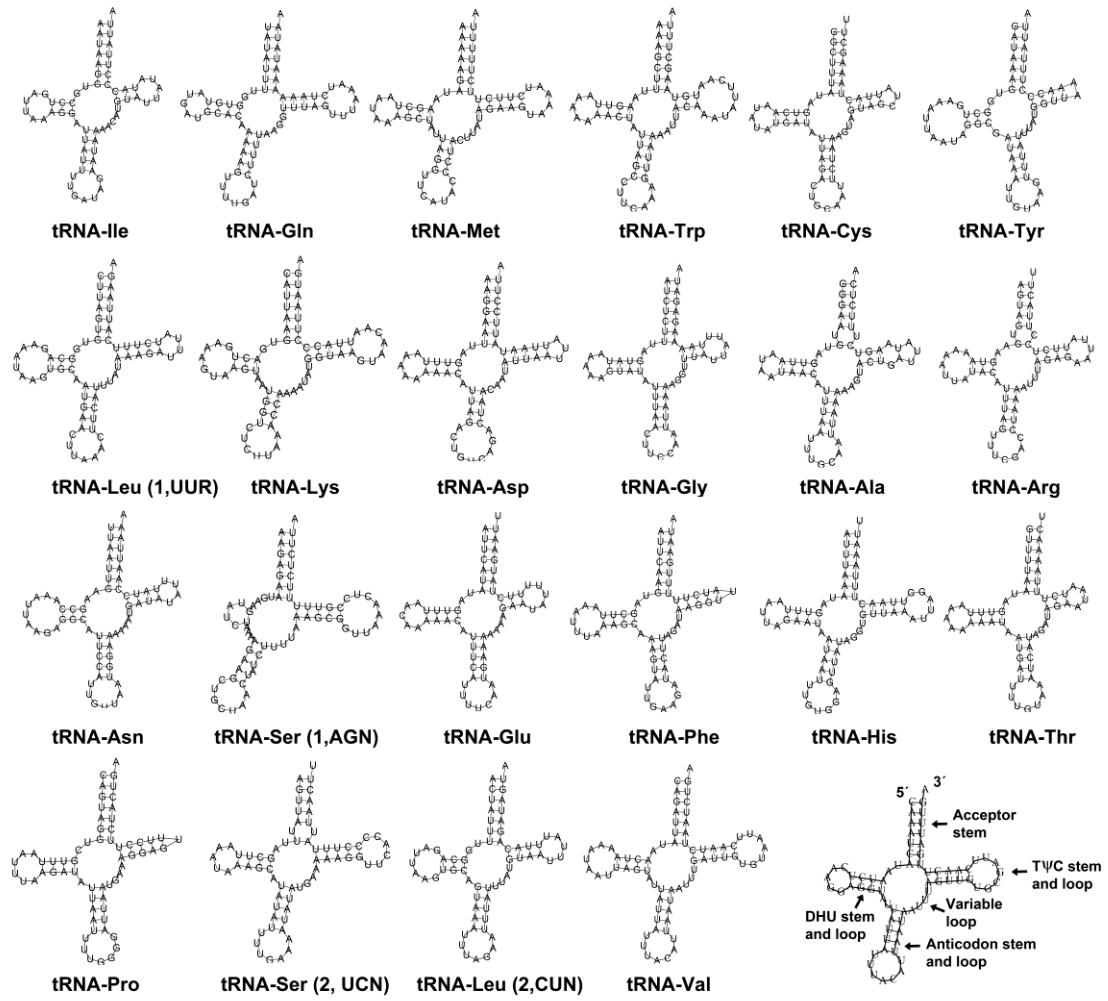

**Figure S1.** Secondary structure of tRNAs in *Triatoma boliviana* mitogenome.

TCGCAAAAAAAAAATCATTAGGTTGACCTAA  
AATATATTTAATTCACCTAAAATAATGCAATAAACATTATAGTAACTCCAGAAAAAGGATATAACTATCCTTATAACTAAGTGCCTAATTTATAACAGTAACGGGGCAAAGTCCCTTAAATTCAAAATAAACATTCAAAGTTTATACTT  
AATATATTTAATTCACCTAAAATAATGCAATAAACATTATAGTAACTCCAGAAAAAGGATATAACTATCCTTATAACTAAGTGCCTAATTTATAACAGTAACGGGGCAAAGTCCCTTAAATTCAAAATAAACATTCAAAGTTTATACTT  
AATATATTTAATTCACCTAAAATAATGCAATAAACATTATAGTAACTCCAGAAAAAGGATATAACTATCCTTATAACTAAGTGCCTAATTTATAACAGTAACGGGGCAAAGTCCCTTAAATTCAAAATAAACATTCAAAGTTTATACTT  
AATATATTTAATTCACCTAAAATAATGCAATAAACATTATAGTAACTCCAGAAAAAGGATATAACTATCCTTATAACTAAGTGCCTAATTTATAACAGTAACGGGGCAAAGTCCCTTAAATTCAAAATAAACATTCAAAGTTTATACTT

**Figure S2.** Sequence of the intergenic spacer located between *tRNA-Ser* (UCN) and *nd1* genes. Repeat sequences are underlined.

|             |                      |                 |             |                         |       |            |                |            |               |            |                    |
|-------------|----------------------|-----------------|-------------|-------------------------|-------|------------|----------------|------------|---------------|------------|--------------------|
|             |                      | 10              | 20          | 30                      | 40    | 50         | 60             | 70         | 80            | 90         | 100                |
| AF301594    | T dimidiata          | CCGGTACATTATCAA | TATAT       | CCCCCCTCCGTATAGCCTCCCCT | GAGGT | GCCCACC    | CGGAACGG       | CGACT      | CTCAAGATTTTTC |            |                    |
| MT757851    | T dimidiata          |                 | G           |                         |       |            |                |            |               |            |                    |
| MT733872    | T dimidiata          | T               | TG          |                         |       |            |                |            |               |            |                    |
| MT757849    | T dimidiata          | T               | TG          |                         |       |            |                |            |               |            |                    |
| MT757850    | T dimidiata          | T               | G           |                         |       | A          |                |            |               |            |                    |
| MT556666    | T dimidiata          |                 | TG          |                         |       |            |                |            |               |            |                    |
| MT556656    | T dimidiata          |                 |             |                         |       |            |                |            |               |            |                    |
| MT757848    | T dimidiata          |                 |             |                         |       |            |                |            |               |            |                    |
| MT733873    | T dimidiata          | T               | TG          |                         |       |            |                |            |               |            |                    |
| MT556657    | T dimidiata          |                 |             |                         |       |            |                |            |               |            |                    |
| MT757852    | T dimidiata          | N               | NN          |                         | N     | N          |                |            |               |            |                    |
| NC 050325   | T huehuetenanguensis |                 | CAG         | G                       |       | C G T      |                | TG T       |               | C          |                    |
| NC 050324   | T mexicana           | T               |             | G                       |       |            |                |            |               |            |                    |
| MT556660    | T phyllosoma         | TT              | AG          |                         |       |            |                |            |               |            |                    |
| NC 050327   | T mazzottii          | TT              | AG          |                         |       |            |                |            |               |            |                    |
| MT556658    | T longipennis        | TT              | AG          |                         |       |            |                |            |               |            |                    |
| MT556663    | T recurva            | TT              | AG          |                         |       |            |                |            | T             |            |                    |
| MT556661    | T picturata          | T               | GG          |                         |       |            |                |            |               |            |                    |
| MT556659    | M pallidipennis      | TT              | G           |                         |       |            |                |            |               |            |                    |
| NC 050329   | T sanguisuga         | T               | GG          |                         | N     |            | G              |            | T             | G C        |                    |
| MT556662    | T protracta          | T               |             | T                       |       | CA         | C              | T C        | TCGG G A      | A A T      | A                  |
| MT556655    | T barberi            | T               |             |                         | A     |            | CA             | C          | T C           | GG G A     | A G T              |
| NC 050326   | T lecticularia       | A               |             | G                       | T     | C C C T    | GC C           | C          | TC G T        | GG G       | T G                |
| MT556654    | D maximus            | A               |             | G                       |       | C CCG T    | CA A           | CA         | TC            | TCCGG G    | T G                |
| NC 042881   | T migrans            | GT              | AG          | T                       |       | T C G      | T CC T GC CAGC | AT         | TT TC A       | T          | AC A               |
| MH934953    | T rubrofasciata      | TT              | A           | ATAT                    |       | A T C      |                | CCTT C AGC | AT G T A AG T | A C A G C  |                    |
| MT556664    | T rubida             | TT              |             | G T                     |       | ATAGT      | G G            |            | CCT T C       | G GT GAA G | C C                |
| NC 042682   | P rufotuberculatus   | T               | AG          |                         |       |            |                |            |               | G T A      | C                  |
| MT561168    | T infestans          |                 | A           | G                       |       | T C G      | AA             | CTT G      | A             | T          | A TC               |
| KY640305    | T infestans          |                 | A           | G                       |       | T C G      | AA             | CTT G      | A             | T          | A TC               |
| MT556665    | T vitticeps          | T               |             | T                       | G T   | T CCT      | G G            | TA         | A             | ATC G      | G C                |
| T boliviana |                      |                 | AGG AATAC C |                         | T T G | G          | TA C           | TG         | CC CA A A     | CC A       |                    |
| BK013130    | R pictipes           | TT              |             | G                       | G T   | CT TCCGGCT | ACGC G         | CGTGGC A   | T CT TC G T   | TGTC ACT   | TTCTC G A          |
| NC 043846   | R pictipes           | TT              |             | G                       | G T   | CT TCCGGCT | ACGC G         | CGTGGC A   | T CT TC G T   | TGTC ACT   | TTCTC G A          |
| NC 050328   | R prolixus           | T               | C           |                         |       | TC T       | CT TCGG C      | ACGC G     | CGTGGC T      | CT TCGG    | CGTC ACT TTTAC G A |

|             |                      |               |                                                    |                                |            |      |       |            |      |                        |                |
|-------------|----------------------|---------------|----------------------------------------------------|--------------------------------|------------|------|-------|------------|------|------------------------|----------------|
|             |                      | 110           | 120                                                | 130                            | 140        | 150  | 160   | 170        | 180  | 190                    | 200            |
| AF301594    | T dimidiata          | C ATGAATAGTT  | ATATTAGATATTAACATATTATTAATATTTTGTATAGTTAAACCATTACC | TATATAAATCTAGTTGCCGTATCTCATATA | ATA        |      |       |            |      |                        |                |
| MT757851    | T dimidiata          | T             |                                                    |                                |            |      |       |            |      |                        |                |
| MT733872    | T dimidiata          | T             |                                                    |                                |            |      |       |            |      |                        |                |
| MT757849    | T dimidiata          | T             |                                                    |                                |            |      |       |            |      |                        |                |
| MT757850    | T dimidiata          | T             |                                                    |                                |            |      |       |            |      |                        |                |
| MT556666    | T dimidiata          | T             |                                                    |                                |            |      |       |            |      |                        |                |
| MT556656    | T dimidiata          | T             |                                                    |                                |            |      |       |            |      |                        |                |
| MT757848    | T dimidiata          | T             |                                                    |                                |            |      |       |            |      |                        |                |
| MT733873    | T dimidiata          | T             |                                                    |                                |            |      |       |            |      |                        |                |
| MT556657    | T dimidiata          | T             |                                                    |                                |            |      |       |            |      |                        |                |
| MT757852    | T dimidiata          |               |                                                    |                                |            |      |       |            |      |                        |                |
| NC 050325   | T huehuetenanguensis | AT            |                                                    |                                |            |      |       |            | G    | A T                    |                |
| NC 050324   | T mexicana           | AT            |                                                    |                                |            |      |       |            | C    | G C                    |                |
| MT556660    | T phyllosoma         | AT            |                                                    |                                |            |      |       |            | T C  | G CT                   | A              |
| NC 050327   | T mazzottii          | AT            |                                                    |                                |            |      |       |            | T C  | G CT                   | A              |
| MT556658    | T longipennis        | AT            |                                                    |                                |            |      |       |            | T C  | G CT                   | A              |
| MT556663    | T recurva            | T             |                                                    |                                |            |      |       |            | T C  | G CT                   | A              |
| MT556661    | T picturata          | AT            |                                                    |                                |            |      |       |            | T    |                        |                |
| MT556659    | M pallidipennis      | TT            |                                                    |                                |            |      |       |            | G    | A                      |                |
| NC 050329   | T sanguisuga         | AT            |                                                    |                                |            |      |       |            | TT C | G CT A                 | C              |
| MT556662    | T protracta          | TT            | T C                                                |                                | A          | TA C | A G   | TT C       | T    | TCG TAC                | TTA G          |
| MT556655    | T barberi            | TT            | T C                                                |                                | G T C      |      | A G   | TT C       | T    | TCG C AT               | TTA GG         |
| NC 050326   | T lecticularia       | ATG           | TG A                                               |                                | G T C      |      | A G   | TC C       | T    | TCG C G                | TTA T GG       |
| MT556654    | D maximus            | ATG           | T T                                                |                                | G T C      |      | A GA  | TG C       | C    | CTCG CG                | TACG T GG CG C |
| NC 042881   | T migrans            | A T A T A CCA |                                                    | TA                             | T C        |      | A A   | T CTT      | C    | GA A                   | GA             |
| MH934953    | T rubrofasciata      | A T ACT CCA   | G                                                  | TG T AT C                      |            | AC   | TA    | T CGT      | CG   | A A A                  | GG T           |
| MT556664    | T rubida             | A T A T T A G | C                                                  | G                              |            | CAC  | G     | TC         | T    | G C ATAG ATTA          | T TC           |
| NC 042682   | P rufotuberculatus   |               | TG TA C                                            |                                | TA T C     |      | A     | T C        |      | GTC GA A ATT G T       | CG T           |
| MT561168    | T infestans          | AT            | T T A CA                                           |                                | GG         |      | A G   |            | A    | AC GC AA GA            | TTAC GTC TACA  |
| KY640305    | T infestans          | AT            | T T A CA                                           |                                | GG         |      | A G   |            | A    | AC GC AA GA            | TTAC GTC TACA  |
| MT556665    | T vitticeps          | AT            | TG TA T A                                          | C                              | C          |      | AC GA | TC C TA    | AC   | AA GA A AACTCA TCATACA |                |
| T boliviana |                      | A T ACT       | A AG                                               |                                | TA G TATAC |      | A G   | TT CG A    | AG   | A A AAG                | TAGTAT         |
| BK013130    | R pictipes           | AT            | T G TAGG                                           | A TG                           | TAC        |      | AC G  | TG AT A G  | AT   | C AT A G GG            | CG             |
| NC 043846   | R pictipes           | AT            | T G TAGG                                           | A TG                           | TAC        |      | AC G  | TG AT A G  | AT   | C AT A G GG            | CG             |
| NC 050328   | R prolixus           | AT            | T G TGGG                                           | A TG                           | TAC        |      | AC G  | TG AT TA A | GAT  | C                      | G G C          |

|             |                      |                                                  |          |          |                   |           |           |       |         |        |           |
|-------------|----------------------|--------------------------------------------------|----------|----------|-------------------|-----------|-----------|-------|---------|--------|-----------|
|             |                      | 210                                              | 220      | 230      | 240               | 250       | 260       | 270   | 280     | 290    | 300       |
| AF301594    | T dimidiata          | CAACT ACCATCTCGATATA GTTAGAATTAAAGTTTCAGATGTCATT | CCCTC    | ATTCTACT | CAACGTAGAAATGACGT | CTGGCT    | TTGCCG    |       |         |        |           |
| MT757851    | T dimidiata          |                                                  |          |          |                   |           |           |       |         |        |           |
| MT733872    | T dimidiata          |                                                  |          |          |                   |           |           |       |         |        |           |
| MT757849    | T dimidiata          |                                                  |          |          |                   |           |           |       |         |        |           |
| MT757850    | T dimidiata          |                                                  |          |          |                   |           |           |       |         |        |           |
| MT556666    | T dimidiata          |                                                  |          |          |                   |           |           |       |         |        |           |
| MT556656    | T dimidiata          |                                                  |          |          |                   |           |           |       |         |        |           |
| MT757848    | T dimidiata          |                                                  |          |          |                   |           |           |       |         |        |           |
| MT733873    | T dimidiata          |                                                  |          |          |                   |           |           |       |         |        |           |
| MT556657    | T dimidiata          |                                                  |          |          |                   |           |           |       |         |        |           |
| MT757852    | T dimidiata          |                                                  |          |          |                   |           |           |       |         |        |           |
| NC 050325   | T huehuetenanguensis |                                                  |          | A        |                   | T C       | T         |       | TC      | T G    |           |
| NC 050324   | T mexicana           |                                                  |          |          |                   |           |           |       |         | GT     |           |
| MT556660    | T phyllosoma         | T                                                |          |          |                   |           |           |       |         |        |           |
| NC 050327   | T mazzottii          | T                                                |          |          |                   |           |           |       |         |        |           |
| MT556658    | T longipennis        | T                                                |          |          |                   |           |           |       |         |        |           |
| MT556663    | T recurva            | T                                                |          |          |                   |           |           |       |         |        |           |
| MT556661    | T picturata          | T                                                |          |          |                   |           |           |       |         |        |           |
| MT556659    | M pallidipennis      |                                                  |          |          |                   |           |           |       |         |        |           |
| NC 050329   | T sanguisuga         |                                                  |          |          |                   |           |           |       |         |        |           |
| MT556662    | T protracta          |                                                  |          |          |                   |           |           |       |         |        |           |
| MT556655    | T barberi            | T                                                |          |          |                   |           |           |       |         |        |           |
| NC 050326   | T lecticularia       |                                                  |          |          |                   |           |           |       |         |        |           |
| MT556654    | D maximus            |                                                  |          |          |                   |           |           |       |         |        |           |
| NC 042881   | T migrans            | G A G G                                          | A        | TACGA C  | C                 | AG        | C A CA CG | T     |         | C AACC | A G       |
| MH934953    | T rubrofasciata      | G AC T                                           | G C A A  | CAACA    | G                 | A         | ACA CA AG |       |         | C      | CCAG AC G |
| MT556664    | T rubida             | T T G T                                          | G T A    | G C      |                   | G ATC A C | T         |       |         | T T A  | GA A      |
| NC 042682   | P rufotuberculatus   |                                                  |          |          |                   |           |           |       |         |        |           |
| MT561168    | T infestans          |                                                  |          |          |                   |           |           |       |         |        |           |
| KY640305    | T infestans          |                                                  |          |          |                   |           |           |       |         |        |           |
| MT556665    | T vitticeps          |                                                  |          |          |                   |           |           |       |         |        |           |
| T boliviana |                      | G TC T                                           |          | G G A    |                   | G         | A A CC A  | CG    | T       |        |           |
| BK013130    | R pictipes           | TTCA TT                                          | AC A A A | CTT      | CG                |           | A TGA     | T ATA | TATATGC |        | T G       |
| NC 043846   | R pictipes           | TTCA TT                                          | AC A A A | CTT      | C T G             |           | A TGA     | T ATA | TATATG  |        | TTG       |



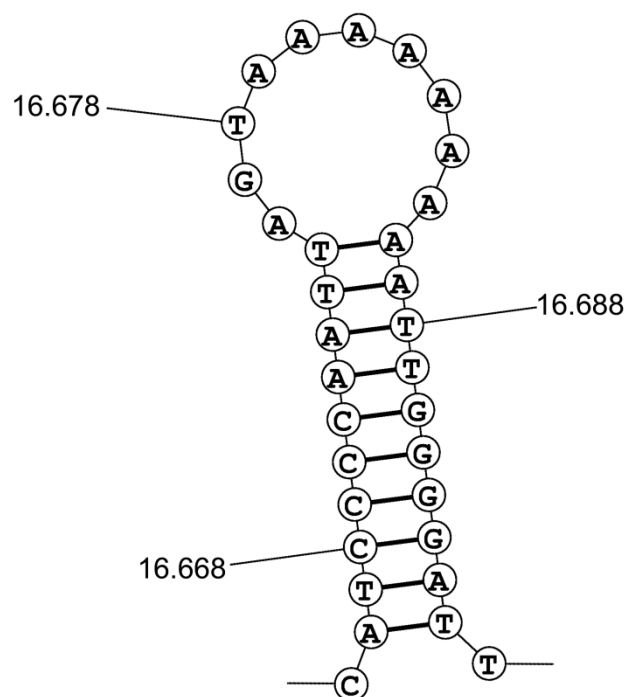

**Figure S5.** Stem-loop structure on last part of the control region. Some nucleotide positions are indicated.
